# Isolation and Characterization of $\phi$ km18p, a Novel Lytic Phage with Therapeutic Potential against Extensively Drug Resistant *Acinetobacter baumannii*

Gwan-Han Shen<sup>1,2,3</sup>, Jiun-Ling Wang<sup>3,4,5</sup>, Fu-Shyan Wen<sup>5</sup>, Kai-Ming Chang<sup>5</sup>, Chih-Feng Kuo<sup>6</sup>, Chun-Hung Lin<sup>7</sup>, Huei-Ru Luo<sup>7</sup>, Chih-Hsin Hung<sup>7\*</sup>

**1** Division of Respiratory and Critical Care Medicine, Department of Internal Medicine, Taichung Veterans General Hospital, Taichung, Taiwan, ROC, **2** Department of Respiratory Therapy, College of Health Care, China Medical University, Taichung, Taiwan, ROC, **3** School of Chinese Medicine for Post Baccalaureate, I-Shou University, Kaohsiung County, Taiwan, ROC, **4** Department of Internal Medicine, E-Da Hospital, Kaohsiung County, Taiwan, **5** Department of Life Science, National Chung Hsing University, Taichung, Taiwan, ROC, **6** Department of Nursing, I-Shou University, Kaohsiung, Taiwan, ROC, **7** Department of Chemical Engineering, and Institute of Biotechnology and Chemical Engineering, I-Shou University, Kaohsiung, Taiwan, ROC

## Abstract

**Aims:** To isolate phages against extensively drug resistant *Acinetobacter baumannii* (XDRAB) and characterize the highest lytic capability phage as a model to evaluate the potential on phage therapy.

**Methods and Results:** Eight phages were isolated from hospital sewage and showed narrow host spectrum. Phage  $\phi$ km18p was able to effectively lyse the most XDRAB. It has a dsDNA genome of 45 kb in size and hexagonal head of about 59 nm in diameter and no tail. Bacterial population decreased quickly from  $10^8$  CFU ml<sup>-1</sup> to  $10^3$  CFU ml<sup>-1</sup> in 30 min by  $\phi$ km18p. The 185 kDa lysis protein encoded by  $\phi$ km18p genome was detected when the extracted protein did not boil before SDS-PAGE; it showed that the lysis protein is a complex rather than a monomer. Phage  $\phi$ km18p improved human lung epithelial cells survival rates when they were incubated with *A. baumannii*. Combination of phages ( $\phi$ km18p,  $\phi$ TZ1 and  $\phi$ 314) as a cocktail could lyse all genotype-varying XDRAB isolates.

**Conclusion:** Infections with XDRAB are extremely difficult to treat and development of a phage cocktails therapy could be a therapeutic alternative in the future. Phage  $\phi$ km18p is a good candidate for inclusion in phage cocktails.

**Citation:** Shen G-H, Wang J-L, Wen F-S, Chang K-M, Kuo C-F, et al. (2012) Isolation and Characterization of  $\phi$ km18p, a Novel Lytic Phage with Therapeutic Potential against Extensively Drug Resistant *Acinetobacter baumannii*. PLoS ONE 7(10): e46537. doi:10.1371/journal.pone.0046537

**Editor:** Brad Spellberg, Los Angeles Biomedical Research Institute, United States of America

**Received:** April 30, 2012; **Accepted:** August 31, 2012; **Published:** October 5, 2012

**Copyright:** © 2012 Shen et al. This is an open-access article distributed under the terms of the Creative Commons Attribution License, which permits unrestricted use, distribution, and reproduction in any medium, provided the original author and source are credited.

**Funding:** This work was supported by grants from the National Science Council, Republic of China (No. NSC 94-2311-B-214-001) and I-Shou University (ISU93-02-17). The funders had no role in study design, data collection and analysis, decision to publish, or preparation of the manuscript.

**Competing Interests:** The authors have declared that no competing interests exist.

\* E-mail: chhung@isu.edu.tw

† These authors contributed equally to this work.

## Introduction

*Acinetobacter baumannii*, a gram-negative, non-fermentative bacterium, is one of the most important nosocomial pathogens in hospitals, especially in intensive care units. *A. baumannii* is an opportunistic pathogen that causes serious nosocomial outbreaks. The mortality rate is elevated and the length of hospitalization is prolonged if drug resistance develops [1,2]. In recent years, multi-drug resistant *A. baumannii* have been spread worldwide including Taiwan [3–5]. More recently, the term “extensively drug resistant” *A. baumannii* (XDRAB) has been used to characterize the bacterial isolates resistant to all authorized antibiotics except 2 category of antibiotic e.g. tigecycline and polymyxins [4,6,7]. Given the increasing prevalence of XDRAB infection with high mortality rate, new antibiotics and are needed to combat this challenge, and one possible solution is the therapeutic use of phages [8–13].

Phages have been used as pharmaceutical agents for more than 90 years. Because of the threat of serious multi-drug resistant

bacterium infection, there has been renewed interest in the use of phages for the treatment of infectious diseases of humans and other animals [8–13]. Numerous animal studies have demonstrated the effectiveness of phages against multi-drug resistant bacteria, such as vancomycin-resistant *Enterococcus faecium* [14], *Escherichia coli* [15], *Pseudomonas aeruginosa* [16–17], *Staphylococcus aureus* [18] and *Vibrio vulnificus* [19]. Some phages of common bacterial pathogens, such as *Listeria monocytogenes*, *Salmonella* spp. and *Pseudomonas*, have been approved for commercial use in food preservation [20–21].

The phages of *Acinetobacter* spp. have been studied previously, but most were used for transduction, phage typing or classification of phages [22–25]. Previous reports have described the phage BS46, which specifically infects *A. baumannii* AC54 and protects infected mice from death [26]. An ssRNA phage, AP205, that propagates in *Acinetobacter* genospecies 16 (*A. radioresistens*) was also isolated and analyzed [27]. Due to the limited efficacy and potential side effect of current antibiotic against XDR-AB, we want to isolate phages against XDR-AB and characterize highest

lytic capability phage as a model to evaluate the potential on phage therapy.

## Materials and Methods

### Bacterial strains

Thirty-four clinical strains of *A. baumannii* from five medical centers (Taichung Veterans General Hospital, National Taiwan University Hospital, Kaohsiung Medical University Chung-Ho Memorial Hospital, Hualien Tzu Chi Medical Center and Tri-Service General Hospital) were used in this study (Table 1). All isolates underwent MIC testing for various drugs, including carbapenems, anti-pseudomonal cephalosporins, anti-pseudomonal penicillins, monobactams, aminoglycosides, tetracyclines, fluoroquinolones, sulbactam and polymyxins, using CLSI (Clinical and Laboratory Standards Institute) guidelines (National Committee for Clinical Laboratory Standards, USA).

### Phage isolation

Sewage samples were collected from various aquatic ecosystems in the Taichung Veterans General Hospital (Taichung, Taiwan) and E-Da Hospital (Kaohsiung, Taiwan) for phage isolation. The presence of phages was investigated using a phage enrichment technique [28]. A 50-ml supernatant from centrifuged sewage was mixed with 50 ml double-strength Luria-Bertani broth containing exponential-phase *A. baumannii* strains. After a 24-h incubation at 37°C, the bacterial cells were centrifuged and the supernatant was filtered through a 0.22- $\mu$ m membrane filter. Then, 10  $\mu$ l of filtrate and the indicator strain were mixed with soft agar and poured onto an LB agar plate. Phage plaques would be visible after overnight incubation at 37°C. Single plaques were selected by a sterile tooth pick and suspended in 500  $\mu$ l PBS. Followed by double layer plaque assay was performed to obtain pure phage strains.

### Purification of phage particles

Phage lysate (ca.  $1 \times 10^{10}$  PFU ml<sup>-1</sup>) was centrifuged at 14,700 $\times$ g for 30 min at 4°C, and then the supernatant was filtered through a 0.22- $\mu$ m filter. The filtered supernatant was treated with nucleases (0.25 mg each of DNase and RNase per ml) for 1 h at 37°C to digest the bacterial genomic DNA. Polyethylene glycol (average molecular weight, 8000 Dalton) and NaCl were added to the filtered phage suspension to yield final concentrations of 3% and 0.33 M, respectively, and the mixture was stored at 4°C for 2 h. The phage in the mixture were collected by centrifugation at 14,700 $\times$ g for 30 min at 4°C, and the pellet was resuspended in PBS buffer. This condensed phage suspension was loaded onto a discontinuous CsCl gradient diluted in PBS buffer and centrifuged at 35,000 rpm for 9 h at 4°C in a Beckman L-90 ultracentrifuge with a SW41Ti rotor. The banded phage particles were collected and dialyzed against PBS buffer (1 h) three times. The purified phage suspension was stored at 4°C until use.

### In vitro test of optimal phage titer to challenge bacterium

To determine the optimal titer for phage to decrease the bacterial concentration was according to the previously described [29]. An overnight host culture was transferred to 30 ml fresh LB broth medium (OD<sub>600</sub> = 0.1) and grown at 37°C until the concentration reached OD<sub>600</sub> = 1.0. Phage  $\phi$ km18p at different multiplicity of infection (MOI of 0.01, 0.1, 1 and 10) were inoculated to the fresh culture (OD<sub>600</sub> = 1.0) separately and incubated at 37°C. The phage-infected culture sample was removed 1 ml at interval time and was centrifuged at 12,000 for

5 min to separate the supernatant and bacterium pellet. Then the pellet was washed with phosphate-buffer saline (PBS) one time, and resuspended with 1 ml PBS. The suspension of pellet was serially diluted and spread on the LB agar (1.5%) plate to determine the visible bacteria.

### Isolation and restriction enzyme digestion of phage DNA

Phage DNA was extracted from the purified phage particles ( $1.0 \times 10^{10}$  PFU ml<sup>-1</sup>) following the procedure described in the Viral Nucleic Extraction Kit II (Geneaid, Taipei, Taiwan). DNA samples were digested with the restriction enzyme *HincII* according to the supplier's instructions (New England Biolabs, Beverly, Mass). The digested DNA was analyzed by electrophoresis through a 0.8% agarose gel prepared with 0.5 $\times$  Tris-Borate-EDTA (TBE) running buffer.

### Pulsed Field Gel Electrophoresis (PFGE)

Pulsed-field gel electrophoresis was performed according to a modification of the protocol described by Tseng *et al.* [30]. Purified phage suspension (ca.  $1 \times 10^{10}$  PFU ml<sup>-1</sup>) was mixed with an equal volume of molten 1% agarose (SeaKem Gold agarose, Cambrex), which was allowed to solidify in a mold (15-mm length  $\times$  1-mm width  $\times$  10-mm depth). The solid block was lysed at 55°C overnight by proteinase K (10 mg ml<sup>-1</sup>) in cell lysis buffer (50 mmol l<sup>-1</sup> Tris, 50 mmol l<sup>-1</sup> EDTA at pH 8.0, 1% Sarkosine). After the proteinase K lysis step, the block of agarose was washed in TE buffer three times for 30 min each. For restriction enzyme digestion, a plug (15-mm  $\times$  1-mm  $\times$  2-mm) was cut from the agarose block containing the phage genomic DNA and washed in sterile distilled water three times. The phage DNA was subjected to restriction digest analysis according to the manufacturer's instructions. The plugs were loaded onto 1% agarose prepared with 0.5 $\times$  TBE (pH 8.0) running buffer. The restriction fragments were separated by PFGE (using the CHEF-DR III apparatus from Bio-Rad, Richmond, CA, USA) at 14°C with a ramping time of 2 s to 12 s for 8 h, at a field strength of 6 V/cm.

### Electron microscopic examination of phage morphology

Samples for electron microscopic examination were prepared as follows: equal amounts of phage suspension ( $10^{10}$  PFU ml<sup>-1</sup>) and 0.1% bacitracin were mixed well, and one drop of this mixture was spotted onto a mesh grid for 3 min. The edge of the grid was touched with a piece of Whatman filter paper to drain away any excess suspension and the grid was then stained with 2% uranyl acetate for 30 s. The prepared samples were examined under a JEM-2000 EX II electron microscope (JEOL, Japan) at an operating voltage of 80 kV.

### SDS-PAGE under non-denaturing conditions

The method was according to the description by Jyothistri *et al.* [31]. To investigate the lysis protein of phage  $\phi$ km18p, phage lysate was centrifuged at 14,700 $\times$ g for 30 min at 4°C, and the supernatant was filtered through a 0.22- $\mu$ m filter. Ammonium sulfate (30%) was added to precipitate the proteins in the filtered suspension, and then the suspension was dialyzed with PBS buffer (137 mmol l<sup>-1</sup> NaCl, 2.7 mmol l<sup>-1</sup> KCl, 10 mmol l<sup>-1</sup> Na<sub>2</sub>HPO<sub>4</sub>, 2 mmol l<sup>-1</sup> KH<sub>2</sub>PO<sub>4</sub>). The protein suspension was mixed with sample buffer without  $\beta$ -mercaptoethanol. The samples were then run on SDS-PAGE without boiling. The resolved gel containing the extracted proteins was plated onto L-agar and soft agar mixed with *A. baumannii* KM18 was poured onto the gel, and incubated at 37°C overnight. Clear zones on the overlay indicate lytic proteins.

**Table 1.** The antibiotic sensitivity results of reference strains and the spot test of eight phages against the reference strains of *A. baumannii* used in this study.

| Strain  | Phages |      |        |       |      |      |      |        | Antibiotics sensitivity <sup>†</sup> | Source <sup>‡</sup> |
|---------|--------|------|--------|-------|------|------|------|--------|--------------------------------------|---------------------|
|         | ϕkm18p | ϕTZ1 | ϕ2449N | ϕAb21 | ϕKM5 | ϕ314 | ϕ134 | ϕ2449p |                                      |                     |
| Ab016   | +++*   | –    | +      | –     | –    | –    | –    | –      | CS                                   | TVG                 |
| Ab019   | +++    | –    | –      | –     | –    | –    | –    | +++    | CS                                   | TVG                 |
| Ab14    | –*     | –    | +      | –     | –    | –    | +++  | +      | CS                                   | TVG                 |
| Ab15    | –      | –    | +++    | –     | –    | +++  | –    | +++    | CS                                   | TVG                 |
| Ab16    | –      | –    | +      | –     | –    | +++  | –    | +++    | CS                                   | TVG                 |
| Ab19    | –      | +++  | –      | –     | –    | –    | –    | –      | CS                                   | TVG                 |
| Ab23    | +++    | –    | –      | –     | –    | –    | +++  | –      | CS                                   | TVG                 |
| Ab26    | –      | –    | +      | –     | –    | +++  | –    | +++    | CS                                   | TVG                 |
| Ab29    | +++    | –    | –      | –     | –    | –    | +++  | +++    | CS                                   | TVG                 |
| Ab35    | +++    | –    | –      | –     | –    | –    | +++  | +++    | CS                                   | TVG                 |
| Ab39    | –      | –    | –      | –     | –    | +++  | –    | +      | CS                                   | TVG                 |
| Ab40    | +++    | –    | –      | –     | –    | –    | +++  | +      | CS                                   | TVG                 |
| Ab54    | –      | –    | –      | –     | –    | –    | –    | +++    | CS                                   | TVG                 |
| TVG55   | –      | –    | +++    | –     | –    | +++  | –    | –      | CRAB                                 | TVG                 |
| NTU2449 | –      | –    | +++    | –     | –    | +    | –    | –      | CRAB                                 | NTU                 |
| KM5     | –      | –    | –      | –     | +++  | –    | –    | –      | MDRAB                                | KM                  |
| Ab21    | +++    | –    | –      | +++   | –    | –    | –    | –      | MDRAB                                | TVG                 |
| TVG68   | +++    | –    | –      | –     | –    | –    | +++  | –      | MDRAB                                | TVG                 |
| Ab002   | +++    | –    | +      | –     | –    | –    | +++  | –      | XDR-AB                               | TVG                 |
| Ab010   | +++    | –    | –      | –     | –    | –    | +++  | +      | XDR-AB                               | TVG                 |
| Ab011   | +++    | –    | –      | –     | –    | –    | +++  | –      | XDR-AB                               | TVG                 |
| Ab015   | +++    | –    | –      | –     | –    | –    | +++  | +      | XDR-AB                               | TVG                 |
| Ab021   | +++    | –    | –      | –     | –    | –    | +++  | +      | XDR-AB                               | TVG                 |
| KM16    | –      | +++  | –      | –     | –    | –    | –    | –      | XDR-AB                               | KM                  |
| KM18    | +++    | –    | –      | –     | –    | –    | +++  | +      | XDR-AB                               | KM                  |
| TSG2    | –      | –    | +      | –     | –    | +++  | –    | –      | XDR-AB                               | TSG                 |
| TSG4    | –      | –    | +++    | –     | –    | +++  | –    | –      | XDR-AB                               | TSG                 |
| TSG5    | –      | +++  | –      | –     | –    | –    | –    | –      | XDR-AB                               | TSG                 |
| TSG6    | –      | +++  | –      | –     | –    | –    | –    | –      | XDR-AB                               | TSG                 |
| TVG46   | +++    | –    | –      | –     | –    | –    | +++  | –      | XDR-AB                               | TVG                 |
| TVG52   | –      | –    | +++    | –     | –    | +++  | –    | –      | XDR-AB                               | TVG                 |
| TVG57   | –      | +++  | –      | –     | –    | –    | –    | –      | XDR-AB                               | TVG                 |
| TVG58   | –      | +++  | –      | –     | –    | –    | –    | –      | XDR-AB                               | TVG                 |
| TZ1     | –      | +++  | –      | –     | –    | –    | –    | –      | XDR-AB                               | TZ                  |

\*“–”: no effect; “+”: turbid zone; “+++”: clear zone.

<sup>†</sup>CS: carbapenem sensitive *A. baumannii*; CRAB: carbapenem resistant *A. baumannii* (including imipenem and meropenem resistant); MDRAB: multi-drug resistant (resistance to 3 or more of the following classes of antipseudomonal cephalosporin, antipseudomonal carbapenem, ampicillin-sulbactam, fluoroquinolone, aminoglycoside); XDR-AB: extensively drug resistant *Acinetobacter baumannii* (resistant to all antibiotics except colistin or tigecycline).

<sup>‡</sup>TVG: Taichung Veterans General Hospital, Medical Center; NTU: National Taiwan University Hospital, Medical Center; KM: Kaohsiung Medical University, Chung-Ho Memorial Hospital; TZ: Hualien Tzu Chi Medical Center.; TSG: Tri-Service General Hospital, Medical Center.

doi:10.1371/journal.pone.0046537.t001

### A549 cell survival test

To ensure the safety of phage therapy, we investigated the toxicity of crude isolated phages to A549 human lung epithelial cells. A549 cells ( $10^5$  cell well<sup>-1</sup>) were plated in a 24-well ELISA plate and incubated for 12 h (37°C, 5% CO<sub>2</sub>) in 100 µl per well of Dulbecco's modified Eagle medium (DMEM) (Sigma, D5523, USA) supplemented with 5% fetal calf serum. Then,  $10^6$  CFU *A. baumannii* KM18 were added to the cells, followed by the

immediate addition of phage at different titers (MOI=0, 1000, 1, 0.1, 0.01). The cells were cultured for 24 h at 37°C in a 5% CO<sub>2</sub> incubator. As a control, A549 cells were treated with  $10^9$  PFU phages without *A. baumannii* KM18. After incubation, the wells were washed twice with PBS and incubated with trypsin-EDTA solution (0.05% trypsin, 0.5 mM EDTA-tetra sodium) to allow surviving cells to separate from the well. The cell counts of

surviving A549 cells suspended in trypsin solution were determined by microscopic observation (Nikon, E2000, Japan).

## Results

### Antibiotic susceptibility and bacterial strain identification

Table 1 showed that 16 strains of *A. baumannii* were XDR-AB (resistant to all antibiotics except colistin or tigecycline). Three strains were carbapenem-resistant (including imipenem- and meropenem-resistant). Two strains resistant to fluoroquinolone were termed MDR-AB. The genomic DNA of these 34 strains was digested with *ApaI* and separated by PFGE. Different DNA patterns were seen after PFGE and indicated that all 34 bacterium were different strains (data not shown).

### Isolation of eight lytic phages

Thirty-four clinical *A. baumannii* strains were used as host indicators for the isolation of lytic phages. Finally, eight lytic phages were isolated and their host ranges were determined by spot tests on these host strains and presented in Table 1. Phages  $\phi$ km18p and  $\phi$ 2449p were isolated from the sewage of Taichung Veterans General Hospital, and the other phages,  $\phi$ TZ1,  $\phi$ 2449N,  $\phi$ Ab21,  $\phi$ KM5,  $\phi$ 314 and  $\phi$ 134, were isolated from the sewage of E-Da Hospital. Table 1 shows that 15 of 34 indicated strains were sensitive to  $\phi$ km18p and distributed in the carbapenem-sensitive and XDRAB groups. Phage  $\phi$ 134 was found to have almost the same host range as  $\phi$ km18p. Phage  $\phi$ 2449p was most virulent to carbapenem-sensitive strains, but was non-lytic to XDRAB strains. Only three bacterial strains were subject to lysogeny by  $\phi$ 2449p. The hosts of  $\phi$ TZ1 and  $\phi$ 314 did not overlap with those of phage  $\phi$ km18p. Therefore, this combination of phages could be used as a cocktail to target all XDRAB. Phages  $\phi$ Ab21 and  $\phi$ KM5 presented the most narrow host range as only one bacterium strain was sensitive to each of them. From the results shown in Table 1, phage  $\phi$ km18p was found to be the most powerful phage. The spot tests of phage  $\phi$ km18p on clinical strains of *A. baumannii* showed the widest range of hosts, including imipenem-susceptible and XDRAB strains. Compared with other phages,  $\phi$ km18p produced more lysis of XDRAB strains than other phages did. We also found that the plaques of  $\phi$ km18p were 2 mm larger in diameter than those of the other seven phages and that  $\phi$ km18p lysed the bacteria more quickly in liquid medium (data not shown). Because most XDRAB strains were sensitive to  $\phi$ km18p and given that  $\phi$ km18p could lyse most strains in this study, it was chosen for further study. In addition to  $\phi$ km18p, the remaining phages were kept as stocks for a phage bank. In the future, their therapeutic efficacy in different mixtures could be evaluated.

### Phage $\phi$ km18p lysed *A. baumannii* KM18 in 30 minutes

Phage  $\phi$ km18p lysed *A. baumannii* KM18 quickly as indicated by big, clear plaques. The lytic activity of  $\phi$ km18p was examined by inoculating phages into *Ac. baumannii* KM18 ( $5 \times 10^8$  CFU ml<sup>-1</sup>). As shown in Fig. 1 (A), the phage titers with MOI of 10, 1, 0.1 and 0.01 decreased KM18 from  $10^8$  CFU ml<sup>-1</sup> to  $10^3$  CFU ml<sup>-1</sup> in 1.5 h. From detailed analysis, an MOI of 1 reduced *A. baumannii* KM18 to the residual titer of  $10^3$  CFU ml<sup>-1</sup> quickly in 30 min, but MOIs of 0.1 and 0.01 were also sufficient to reduce *A. baumannii* KM18 to the same point in 1 h and 1.5 h, respectively. The lytic activity of an MOI of 10 was also tested; it showed the same results as for an MOI of 1. A higher dose of phage was better for reducing the bacterium concentration but is not absolutely necessary for lysis. The bacterium concentration was raised after phage inoculating 2 h later, and finally all the phage-infected

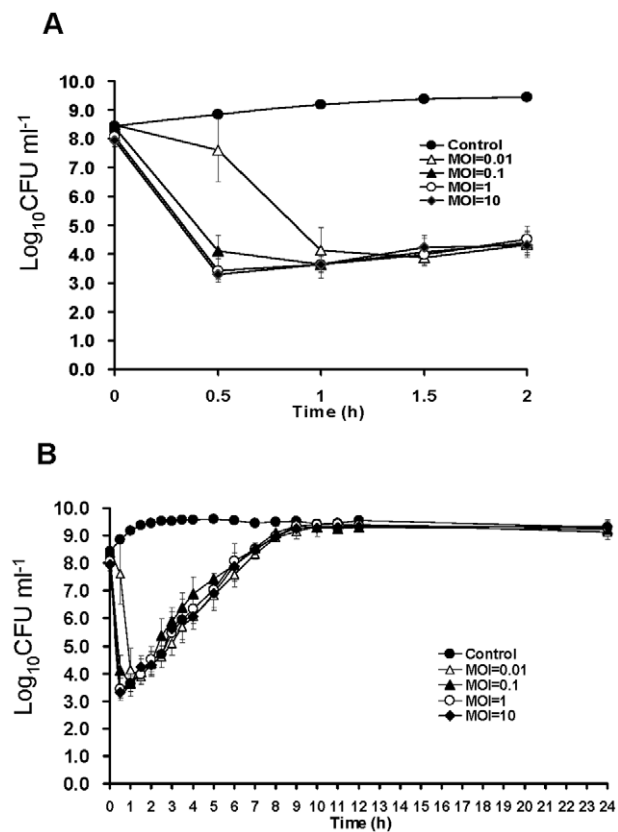

**Figure 1. Relationship between phage titers and inhibition efficiency.** Phages  $\phi$ km18p were used at different titers to infect host cells in order to determine the best titer for lysis of the host during 2 hr (A) and 24 h (B) periods. Phage concentration: (●) no phage added, (○) MOI=1, (▼) MOI=0.1 and (△) MOI=0.01. doi:10.1371/journal.pone.0046537.g001

bacterium concentrations were raised as the control after the phage was inoculated 10 h later (Fig. 1 (B)).

### Electron micrograph of phage morphology

An electron micrograph of phage particles revealed that the phage has a hexagonal head 59 nm in diameter and lacks a tail (Fig. 2). The  $\phi$ km18p phage particles were concentrated in a visible band at a density of  $1.5 \text{ g ml}^{-1}$  in a CsCl gradient. Phage  $\phi$ km18p was similar in morphology and size to phage PM2 [32] and should be assigned to the family *Corticoviridae* according to the taxonomic database of ICTVdB [33].

### Phage genome size and protein profiles

Restriction fragments of phage DNA were separated by gel electrophoresis and PFGE to determine the genome size. *HincII* fragments of phage DNA were separated by gel electrophoresis, resulting in DNA patterns that included double bands for approximately 19 fragments (Fig. 3, (A)). The optimal second enzyme *NheI* was also used to digest genomic DNA, resulting in six fragments visible on a PFGE gel (Fig. 3, (B)). From the *HincII* and *NheI* digest patterns, the genome size of phage  $\phi$ km18p was found to be approximately 45 kb. Phage virion structural proteins were at least 12 protein patterns and the most abundant protein was 39 kDa which was predicted to be a major coat protein (Fig. 4).

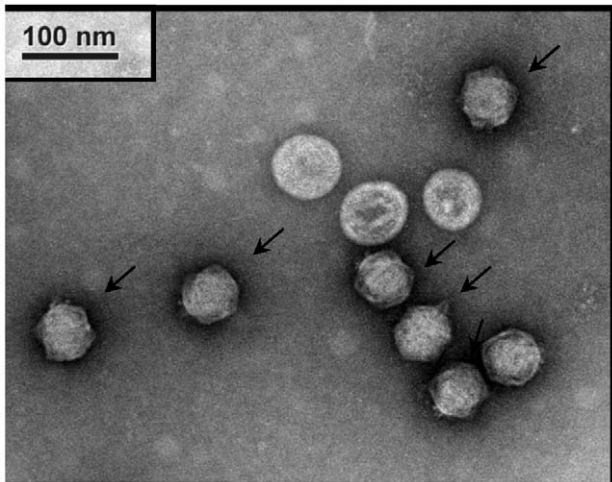

**Figure 2. Electron micrographs of *A. baumannii* phage  $\phi$ km18p.** Phage suspension was loaded onto a copper grid, stained with 2% uranyl acetate and observed with transmission electron microscopy. The phage particles (the arrows indicated) showed a hexagonal head about 59 nm in diameter that lacks a neck and tail.  
doi:10.1371/journal.pone.0046537.g002

**Phage endolysin activity was shown by bacterium overlay of a PAGE gel**

Upon release, the phages burst the bacteria, causing endolysin to flow outside into the medium. Proteins of supernatant were precipitated by 30% ammonia sulfate and separated by SDS-PAGE, as described in the materials and methods. Bacterium overlay on SDS-PAGE showed a clear band at 185 kDa, but clear band disappeared when the sample was boiling treatment before electrophoresis (Fig. 5). From this result, we suggest that the endolysin functions in a complex rather than as a monomer.

**Phage ensures A549 cell survival under bacterial infection**

To ensure the safety of phage therapy, A549 human lung epithelial cells were used as an indicator for phage toxicity. The phage  $\phi$ km18p was found to provide the highest protection against *A. baumannii* KM18 infection of cells ( $10^5$  cells) (Fig. 6). Phage at an MOI of 1, 0.1 or 0.01 enabled cells inoculated with *A. baumannii* KM18 ( $10^6$  CFU) to survive as well as uninoculated controls. Cells treated with phages at an MOI of 1000 ( $10^9$  PFU), but not inoculated with bacteria, survived as well as the control cells. Cells inoculated with the bacterial strain *A. baumannii* KM18 only without any phage treatment were completely killed. The results showed that  $\phi$ km18p eliminated bacteria and protected A549 cells from immediate killing by KM18 bacteria. They also suggested that a high dose of phages did not impact A549 survival.

**Discussion**

Phage  $\phi$ km18p has assigned to the family *Corticoviridae* and was a new phage of *Ac. baumannii*. Previously, several phage species have been isolated. They belong to the *Myoviridae*, *Siphoviridae* and *Podoviridae* families of tailed phages [23]. An ssRNA bacteriophage of *Acinetobacter* from the family *Leviviridae* was also identified [27].

Our purpose was to investigate the possibility of phage therapy to eliminate XDRAB and found phage  $\phi$ km18p was a good candidate. From the report of Soothill [26], the phage BS46 provided protection to *A. baumannii*-infected mice, indicating that it is possible to control antibiotic-resistant *A. baumannii* by phage

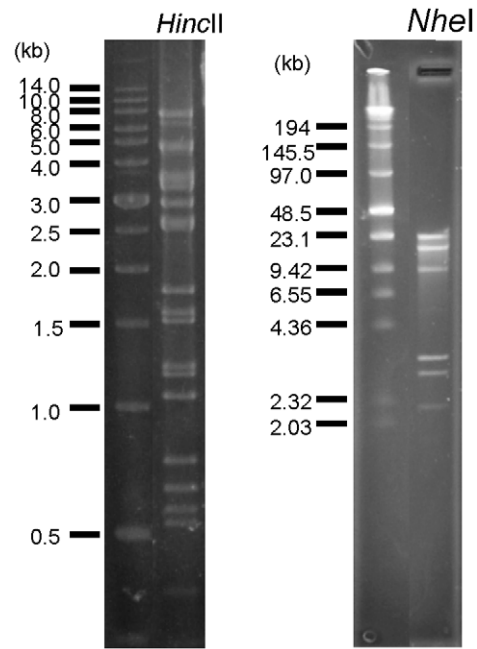

**Figure 3. Phage  $\phi$ km18p genomic DNA restriction patterns and size determination.** (A) Agarose gel electrophoresis of *HincII* fragments. (B) *NheI* fragments separated by PFGE. The total size of genomic DNA was estimated at approximately 45 kb.  
doi:10.1371/journal.pone.0046537.g003

therapy. In our study, clinical *A. baumannii* isolates were used to survey lytic phages. We chose the most active phages for further analysis of their plaque morphology, effect on bacterial growth, genome size, endolysin activity and protection of cells. We examined the antibiotic sensitivity of these 34 strains of *A. baumannii*, and classified them as CS, CRAB, MDRAB and XDRAB. All of the bacterial strains were sensitive to the phages

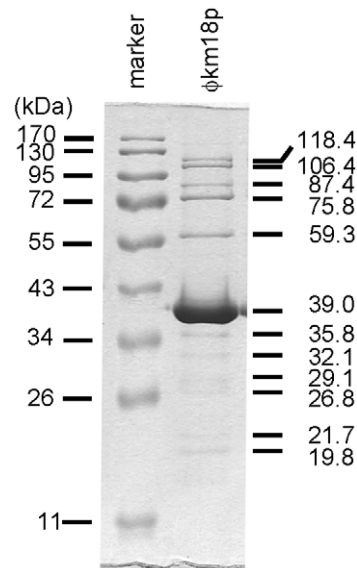

**Figure 4. The phage particle virion proteins were separated by SDS-PAGE.** The phage particles ( $1.5 \times 10^{10}$  PFU) were boiled with cracking buffer and subjected to SDS-PAGE using 12% gels. The most abundant protein was 39 kDa.  
doi:10.1371/journal.pone.0046537.g004

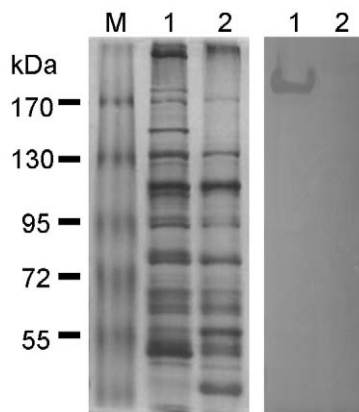

**Figure 5. Phage endolysin activity and size were determined by an overlay assay.** The protein suspension extract (about 13 mg) from the phage lysate was mixed with sample buffer without  $\beta$ -mercaptoethanol. Unboiled samples were analyzed by SDS-PAGE. The control set used a sample buffer containing  $\beta$ -mercaptoethanol and the sample was boiled for 10 min. The SDS-PAGE gel was poured onto a plate and soft agar mixed with *Ac. baumannii* KM18 was overlaid. The protein with endolysin activity produced a clear region on the overlay. doi:10.1371/journal.pone.0046537.g005

isolated in this study. The phage  $\phi$ km18p was unique among the phage isolates; 15 bacterial strains were sensitive to it, including seven XDRAB strains. Although host specificity of phages is a major limitation for therapy, a phage cocktail could combat bacteria in an emergency. Table 1 shows that the host ranges of the studied phages are narrow. Phage  $\phi$ km18p (44.1%) had the broadest range of hosts and triggered lysis in all hosts; the other phages showed decreased efficiency of infecting these strains. The major drawback of phages is their narrow host range; therefore, a large combination of phages is needed for therapy. The lytic and lysogeny phage, such as  $\phi$ 2449p was most virulent to carbapenem-sensitive strains, but non-lytic and lyogeny to XDRAB strains was not a suitable candidate for cocktail combination. The lytic or lysogeny pathway was determined when the phage DNA was injected into host, if the genome of phage integrate into host DNA and coexist in it, some antibiotic resistant gene or other host fragment would be assembly into the new synthesis phages. Using the lysogenic phage as the agent would dangerously transfer the multidrug resistant genes or toxic genes to other hosts. The candidates of phage for biocontrol or phage therapy should be obligate lytic to bacterium. These phages shouldn't have integrases; would degrade the host genome DNA and lack the opportunities to coexist with their host. However, many genes of isolated phages still lack function information and database matches [34]. We tried to isolate phages to combat all of the bacterial strains shown in Table 1. None of the phages had efficient activity against most bacterial strains, but each bacterial strain could be lysed by at least one phage. We believe that every derived bacterial strain can be lysed by one type of phage in nature.

Phage  $\phi$ km18 decreased the concentration of *A. baumannii* from  $10^9$  CFU  $\text{ml}^{-1}$  to  $10^3$  CFU  $\text{ml}^{-1}$  within 30 min and maintained this concentration for about 2 h. But the high titer of phage with MOI = 10 presented the same lytic activity as MOI = 1 (Fig. 1(A)). It was thought that the higher titer of phage inoculation would get higher efficiency on cleaning the bacterium, but the complex dynamic interactions between hosts and the phages always have to optimize the efficiency of phage as the agent for phage therapy. Each phage has its' optimal concentration to interact to its' host.

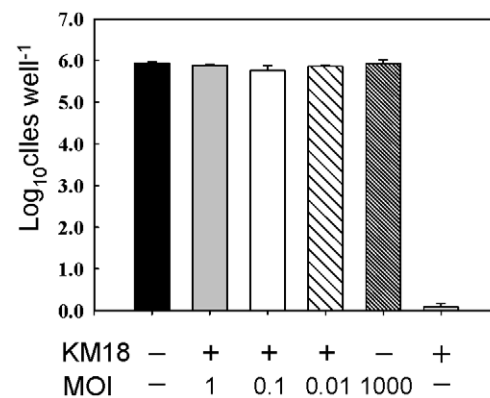

**Figure 6. Protection efficacy test of  $\phi$ km18p on A549 human lung epithelial cells.** A549 cells were distributed in a 24-well ELISA plate ( $10^5$  cells  $\text{well}^{-1}$ ) and incubated for 12 h. The cells were infected with  $10^6$  CFU *Ac. baumannii* KM18. Phage at different titers (MOI = 0, 1000, 1, 0.1, 0.01) was added to the cells. The "+" indicates the addition of phage and "-" means phage were not added. The cell counts of surviving A549 cells suspended in trypsin solution were determined by examination under the microscope (Nikon, E2000, Japan). Results were confirmed by repeating the experiments three times. doi:10.1371/journal.pone.0046537.g006

Higher titer of phage would raise the attaching rate on the host and decrease the bacterium concentration quickly. But sometimes phage would induce the phage-immune system and refuses other phage infection. There is also possible that the phage titer is saturate and receptors for phage are occupied and the bacterium reduction will not increase with increase MOI values. [35–36]. Thus it would be a property of phage that only interacts with a small portion of hosts in the purpose to their reproductivity. The burst size would be the factor to explain the phages could evolve to utilize a small proportion of host, probability of death of hosts and the time for phage production. But also interpret that the maturation of progeny is asynchronous with actual time of lysis and leaving the flexible control point [37–38]. As with any phage-host interaction, bacterial growth increases over time [29,39–40]. Another possible explanation for this finding is the production of mutant phage-resistant strains. Phage-resistant bacteria have been mentioned in many articles [41–43]. However, phage sensitivities also resulted in a change in Omp (outer membrane protein) and LPS (lipopolysaccharide) profiles of the bacteria [42]. Bacterial growth eventually rises after infection by one type of phage, but a cocktail of lytic phages completely eliminates the pathogen [29].

Human lung epithelial cells A549 ( $10^5$  cells  $\text{well}^{-1}$ ) were killed when inoculated with  $10^4$  CFU of *A. baumannii* KM18. In this study, a higher concentration ( $10^6$  CFU) of bacteria was used to infect the cells and to investigate the protective efficacy of phages on the cells. The data presented in Fig. 6 showed that  $\phi$ km18p increased the survival rate after 24-h incubation to the same rate as the control without added pathogen. Otherwise, the phage  $\phi$ km18p did not affect the growth of A549 cells, indicating that the phage  $\phi$ km18p is a potential candidate for phage therapy. Also, bacteria infected with phage  $\phi$ km18p started to proliferate at two hour after infection, causing the growth curve to rise again. The bacterial density was also found to increase after a 24-h incubation of A549 cells, *A. baumannii* KM18 and  $\phi$ km18p (Fig. 1(B)). But why did the bacterial cells survive under a high titer of *A. baumannii* KM18? We analyzed the surviving bacteria and found that phage-resistant bacterial strains had developed (data not shown). Further animal model experiments should be performed to confirm that phage  $\phi$ km18p protect animal infected by XDRAB.

When the phage particles matured in the bacteria, the endolysin encoded by phage genes hydrolyzed the cell wall of the host and disrupted the bacterium, causing the phage particles to burst [18,44]. When the bacteria were destroyed, endolysin was also released into the lysate. The protein with lytic activity showed a clear pattern on the bacterial overlay, indicating a protein size of about 185 kDa (Fig. 5). From the results, it was suggested that the lytic protein is a multimer because the protein with lytic activity disappeared after denaturation by boiling. Purified phage-encoded peptidoglycan hydrolase (lysin) is also reported to be effective for the treatment of bacterial infections [43].

Current treatment of XDRAB included tigecycline and colistin [45–46]. Colistin is limited by its potential renal toxicity [45]. Tigecycline is limited by lack of efficacy bloodstream and urinary tract infection [46]. Besides, emerging resistance to colistin and tigecycline has been reported [3,4,7]. Phage therapy is a revitalized therapy against bacterial infectious diseases. Previous reports have shown that appropriate administration of living phages can be used to manage life-threatening infectious diseases

caused by gram-negative bacteria, such as *E. coli*, *A. baumannii*, *K. pneumoniae* and *P. aeruginosa* [26,47–48]. The Poles and the Soviets have administered phages orally, topically and systemically to treat different antibiotic-resistant pathogens, including *Staphylococcus*, *Streptococcus*, *Klebsiella*, *Escherichia*, *Proteus*, *Pseudomonas*, *Shigella*, *Salmonella* and *Acinetobacter* spp. [8]. The phages specific for XDRAB described in this study will hopefully be prepared to cope with the resistance.

## Acknowledgments

We greatly appreciated Professor Shih-Tung Liu (Chang Gung University, Tao-Yuan, Taiwan) kindly to provide support on TEM examinations.

## Author Contributions

Conceived and designed the experiments: GHS CHH. Performed the experiments: FSW KMC CHH. Analyzed the data: JLW CHH. Contributed reagents/materials/analysis tools: CFK CHL HRL. Wrote the paper: GHS JLW CHH.

## References

- Cisneros JM, Rodriguez-Bano J, Fernandez-Cuenca F, Ribera A, Vila J, et al. (2005) Risk-factors for the acquisition of imipenem-resistant *Acinetobacter baumannii* in Spain: a nationwide study. *Clin Microbiol Infect* 11: 874–879.
- Sunenshine RH, Wright MO, Maragakis LL, Harris AD, Song X, et al. (2007) Multidrug-resistant *Acinetobacter* infection mortality rate and length of hospitalization. *Emerg Infect Dis* 13: 97–103.
- Garnacho-Montero J, Amaya-Villar R (2010) Multiresistant *Acinetobacter baumannii* infections: epidemiology and management. *Curr Opin Infect Dis* 23: 332–339.
- Karageorgopoulos DE, Falagas ME (2008) Current control and treatment of multidrug-resistant *Acinetobacter baumannii* infections. *Lancet Infect Dis* 8: 751–762.
- Hsueh PR, Teng LJ, Chen CY, Chen WH, Yu CJ, et al. (2002) Pandrug-resistant *Acinetobacter baumannii* causing nosocomial infections in a university hospital, Taiwan. *Emerg Infect Dis* 8: 827–832.
- Giske CG, Monnet DL, Cars O, Carmeli Y (2008) Clinical and economic impact of common multidrug-resistant gram-negative bacilli. *Antimicrob Agents Chemother* 52: 813–821.
- Magiorakos AP, Srinivasan A, Carey RB, Carmeli Y, Falagas ME, et al. (2012) Multidrug-resistant, extensively drug-resistant and pandrug-resistant bacteria: an international expert proposal for interim standard definitions for acquired resistance. *Clin Microbiol Infect* 18:268–281.
- Alisky J, Iczkowski K, Rapoport A, Troitsky N (1998) Bacteriophages show promise as antimicrobial agents. *J Infect* 36: 5–15.
- Matsuzaki S, Rashed M, Uchiyama J, Sakurai S, Ujihara T, et al. (2005) Bacteriophage therapy: a revitalized therapy against bacterial infectious diseases. *J Infect Chemother* 11: 211–219.
- Sulakvelidze A, Alavidze Z, Morris JG Jr (2001) Bacteriophage therapy. *Antimicrob Agents Chemother* 45: 649–659.
- Summers WC (2001) Bacteriophage therapy. *Annu Rev Microbiol* 55, 437–451.
- Anisimov AP, Amoako KK (2006) Treatment of plague: promising alternatives to antibiotics. *J Med Microbiol* 55: 1461–1475.
- Fortuna W, Miedzybrodzki R, Weber-Dabrowska B, Gorski A (2008) Bacteriophage therapy in children: facts and prospects. *Med Sci Monit* 14: RA126–132.
- Biswas B, Adhya S, Washart P, Paul B, Trostel AN, et al. (2002) Bacteriophage therapy rescues mice bacteremic from a clinical isolate of vancomycin-resistant *Enterococcus faecium*. *Infect Immun* 70: 204–210.
- Barrow P, Lovell M, Berchieri A Jr (1998) Use of lytic bacteriophage for control of experimental *Escherichia coli* septicemia and meningitis in chickens and calves. *Clin Diagn Lab Immunol* 5: 294–298.
- Vinodkumar CS, Kalsurmath S, Neelagund YF (2008) Utility of lytic bacteriophage in the treatment of multidrug-resistant *Pseudomonas aeruginosa* septicemia in mice. *Indian J Pathol Microbiol* 51: 360–366.
- Watanabe R, Matsumoto T, Sano G, Ishii Y, Tateda K, et al. (2007) Efficacy of bacteriophage therapy against gut-derived sepsis caused by *Pseudomonas aeruginosa* in mice. *Antimicrob Agents Chemother* 51: 446–452.
- Matsuzaki S, Yasuda M, Nishikawa H, Kuroda M, Ujihara T, et al. (2003) Experimental protection of mice against lethal *Staphylococcus aureus* infection by novel bacteriophage phi MR11. *J Infect Dis* 187: 613–624.
- Cervený KE, Depaola A, Duckworth DH, Gulig PA (2002) Phage therapy of local and systemic disease caused by *Vibrio vulnificus* in iron-dextran-treated mice. *Infect Immun* 70: 6251–6262.
- Lang LH (2006) FDA approves use of bacteriophages to be added to meat and poultry products. *Gastroenterology* 131: 1370.
- Guenther S, Huwyler D, Richard S, Loessner MJ (2009) Virulent bacteriophage for efficient biocontrol of *Listeria monocytogenes* in ready-to-eat foods. *Appl Environ Microbiol* 75: 93–100.
- Herman NJ, Juni E (1974) Isolation and characterization of a generalized transducing bacteriophage for *Acinetobacter*. *J Virol* 13: 46–52.
- Ackermann HW, Brochu G, Emadi Konjin HP (1994) Classification of *Acinetobacter* phages. *Arch Virol* 135: 345–354.
- Bouvet PJ, Jeanjean S, Vieu JF, Dijkshoorn L (1990) Species, biotype, and bacteriophage type determinations compared with cell envelope protein profiles for typing *Acinetobacter* strains. *J Clin Microbiol* 28: 170–176.
- Joly-Guillou ML, Bergogne-Berezin E, Vieu JF (1990) A study of the relationships between antibiotic resistance phenotypes, phage-typing and biotyping of 117 clinical isolates of *Acinetobacter* spp. *J Hosp Infect* 16: 49–58.
- Soothill JS (1992) Treatment of experimental infections of mice with bacteriophages. *J Med Microbiol* 37: 258–261.
- Klovins J, Overbeek GP, Van Den Worm SH, Ackermann HW, Van Duin J (2002) Nucleotide sequence of a ssRNA phage from *Acinetobacter*: kinship to coliphages. *J Gen Virol* 83: 1523–1533.
- Weiss BD, Capage MA, Kessel M, Benson SA (1994) Isolation and characterization of a generalized transducing phage for *Xanthomonas campestris* pv. *campestris*. *J Bacteriol* 176: 3354–3359.
- García P, Madera C, Martiez B, Rodriuez A (2007) Biocontrol of *Staphylococcus aureus* in curd manufacturing processes using bacteriophages. *International Dairy Journal* 17: 1232–1239.
- Tseng YH, Choy KT, Hung CH, Lin NT, Liu JY, et al. (1999) Chromosome map of *Xanthomonas campestris* pv. *campestris* 17 with locations of genes involved in xanthan gum synthesis and yellow pigmentation. *J Bacteriol* 181: 117–125.
- Jyothisri K, Deepak V, Rajeswari MR (1999) Purification and characterization of a major 40 kDa outer membrane protein of *Acinetobacter baumannii*. *FEBS Lett* 443: 57–60.
- Kivela HM, Kalkkinen N, Bamford DH (2002) Bacteriophage PM2 has a protein capsid surrounding a spherical proteinaceous lipid core. *J Virol* 76: 8169–8178.
- ICTVdB Management (2006) In: ICTVdB - The Universal Virus Database, version 4. Buchen-Osmond C, editor. New York: Columbia University. Available: <http://www.ncbi.nlm.nih.gov/ICTVdb/ICTVdB/>. Accessed 2012 Sep 14.
- Brüssow H (2005) Phage therapy: the *Escherichia coli* experience. *Microbiol* 151: 2133–2144.
- Kocharunchitt C, Ross T, McNeil DL (2009) Use of bacteriophages as biocontrol agents to control *Salmonella* associated with seed sprouts. *Int J Food Microbiol* 128:453–9.
- Vieira A, Silva YJ, Cunha A, Gomes NC, Ackermann HW, et al. (2012) Phage therapy to control multidrug-resistant *Pseudomonas aeruginosa* skin infections: in vitro and ex vivo experiments. *Eur J Clin Microbiol Infect Dis*. doi: 10.1007/s10096-012-1691-x.
- Gadakar R, Gopinathan KP (1980) Bacteriophage burst size during multiple infections. *J Biosci* 2: 253–259.
- Hyman P, Abedon ST (2009) Practical Methods for Determining Phage Growth Parameters. In: Clokie MRJ, Kropinski AM, editors. *Bacteriophages: Methods and Protocols*, Volume 1: Isolation, Characterization, and Interactions, vol. 501. New York: Humana Press. pp. 175–202.
- Kudva IT, Jelacic S, Tarr PI, Youderian P, Hovde CJ (1999) Biocontrol of *Escherichia coli* O157 with O157-specific bacteriophages. *Appl Environ Microbiol* 65: 3767–3773.

40. Carey-Smith GV, Billington C, Cornelius AJ, Hudson JA, Heinemann JA (2006) Isolation and characterization of bacteriophages infecting *Salmonella* spp. *FEMS Microbiol Lett* 258: 182–186.
41. Fischer CR, Yoichi M, Unno H, Tanji Y (2004) The coexistence of *Escherichia coli* serotype O157:H7 and its specific bacteriophage in continuous culture. *FEMS Microbiol Lett* 241: 171–177.
42. Mizoguchi K, Morita M, Fischer CR, Yoichi M, Tanji Y, et al. (2003) Coevolution of bacteriophage PP01 and *Escherichia coli* O157:H7 in continuous culture. *Appl Environ Microbiol* 69: 170–176.
43. Park SC, Shimamura I, Fukunaga M, Mori KI, Nakai T (2000) Isolation of bacteriophages specific to a fish pathogen, *Pseudomonas plecoglossicida*, as a candidate for disease control. *Appl Environ Microbiol* 66: 1416–1422.
44. Young R (1992) Bacteriophage lysis: mechanism and regulation. *Microbiol Rev* 56: 430–481.
45. Hartzell JD, Neff R, Ake J, Howard R, Olson S, et al. (2009) Nephrotoxicity associated with intravenous colistin (colistimethate sodium) treatment at a tertiary care medical center. *Clin Infect Dis* 48:1724–1728.
46. Karageorgopoulos DE, Kelesidis T, Kelesidis I, Falagas ME (2008) Tigecycline for the treatment of multidrug-resistant (including carbapenem-resistant) *Acinetobacter* infections: a review of the scientific evidence. *J Antimicrob Chemother* 62: 45–55.
47. Chhibber S, Kaur S, Kumari S (2008) Therapeutic potential of bacteriophage in treating *Klebsiella pneumoniae* B5055-mediated lobar pneumonia in mice. *J Med Microbiol* 57: 1508–1513.
48. Tanji Y, Shimada T, Fukudomi H, Miyanaga K, Nakai Y, et al. (2005) Therapeutic use of phage cocktail for controlling *Escherichia coli* O157:H7 in gastrointestinal tract of mice. *J Biosci Bioeng* 100, 280–287.
